# Supplementary material for: Highly sulfonated graphene and graphene oxide nanosheets as heterogeneous nanocatalysts in green synthesis of bisphenolic antioxidants under solvent free conditions
Source: Royal Society of Chemistry journal article supplement (doi:10.1039/c4ra10177d), 2014-01-01

## **Supporting Information**

### **Highly Sulfonated Graphene and Graphene Oxide Nanosheets as Heterogeneous Nanocatalysts in Green Synthesis of Bisphenolic Antioxidants under Solvent Free Conditions**

Hossein Naeimi\*, Mohsen Golestanzadeh

Department of Organic Chemistry, Faculty of Chemistry, University of Kashan, Kashan,  
8731751167, I. R. Iran

E-mail: [naeimi@kashanu.ac.ir](mailto:naeimi@kashanu.ac.ir)

<sup>1</sup>H NMR Spectra of prepared compounds.

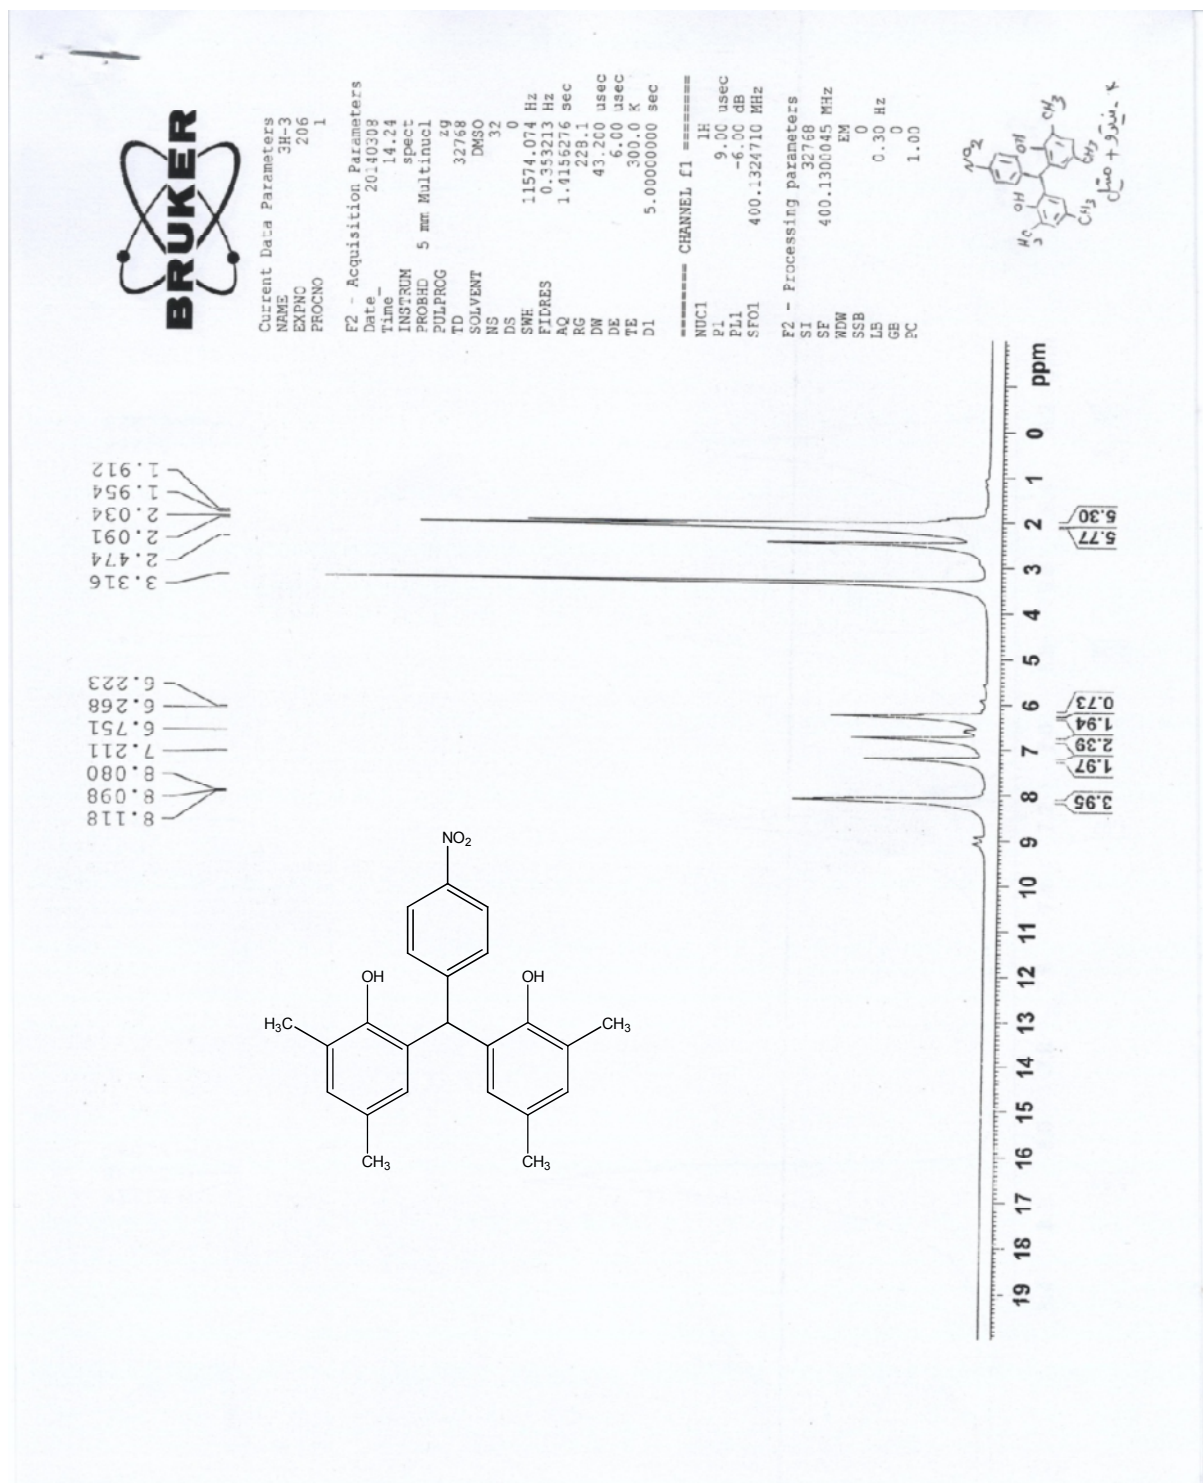

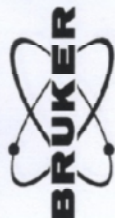

Current Data Parameters  
NAME 3H-3  
EXPNO 209  
PROCNO 1

F2 - Acquisition Parameters  
Date\_ 20140306  
Time 15.52  
INSTRUM spect  
PROBHD 5 mm Multibore1  
PULPROG zgpg30  
TD 32768  
SOLVENT DMSO  
NS 16  
DS 0  
SWH 11574.074 Hz  
FIDRES 0.353213 Hz  
AQ 1.4156276 sec  
RG 101.6  
LW 43.200 usec  
DE 6.00 usec  
TE 300.0 K  
D1 5.0000000 sec

CHANNEL f1  
NUC1 <sup>1</sup>H  
P1 9.00 usec  
PL1 -2.00 dB  
SFO1 400.1324710 MHz

F2 - Processing parameters  
SI 32768  
SF 400.1300045 MHz  
WDW EM  
SSB 0  
LB 0.30 Hz  
GB 0  
PC 1.00

8.084  
8.032  
7.732  
7.550  
7.531  
7.512  
7.439  
6.752  
6.576  
6.287  
6.240

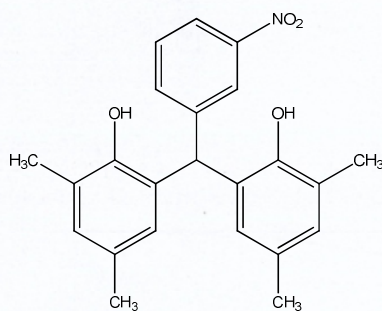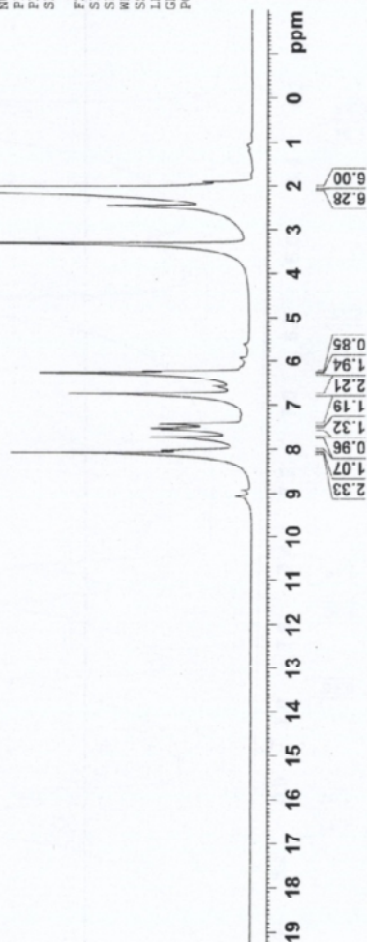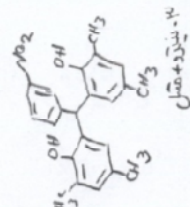

4-نیترو-2-میل

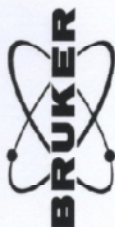

Current Data Parameters  
NAME 3H-3  
EXPNO 234  
PROCNO 1

F2 - Acquisition Parameters  
Date\_ 20140312  
Time 8.16  
INSTRUM spect  
PROBHD 5 mm Multinucl  
PULPROG zg  
TD 32768  
SOLVENT DMSO  
NS 32  
DS 0  
SWH 11574.074 Hz  
FIDRES 0.353213 Hz  
AQ 1.4156276 sec  
RG 161.3  
DW 43.200 usec  
DE 6.00 usec  
TE 300.0 K  
D1 5.00000000 sec

===== CHANNEL f1 =====  
NUC1 1H  
P1 9.00 usec  
PL1 -6.00 dB  
SFO1 400.1324710 MHz

F2 - Processing parameters  
SI 32768  
SF 400.1300045 MHz  
WDW EM  
SSB 0  
LB 0.30 Hz  
GB 1.00  
PC 0

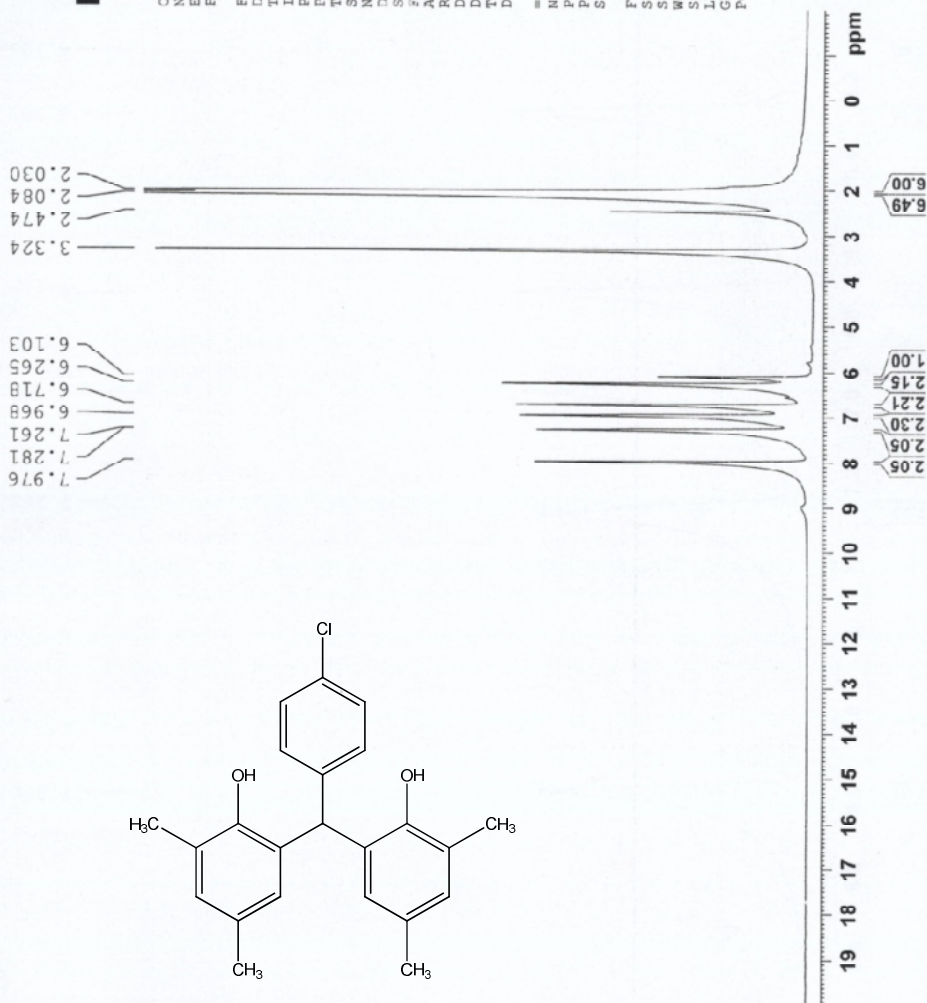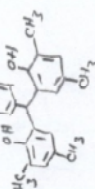

Chemical structure of the compound, 2,6-bis(4-chlorophenyl)-2,6-dimethyl-1,4-bis(4-hydroxyphenyl)ethane.



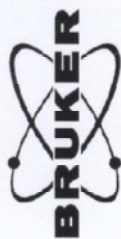

Current Data Parameters  
NAME 3H-3  
EXPNO 171  
PROCNO 1

F2 - Acquisition Parameters  
Date\_ 20140304  
Time 8.37  
INSTRUM spect  
PROBHD 5 mm Multinucl  
PULPROG zg  
TD 32768  
SOLVENT DMSO  
NS 32  
DS 0  
SWH 11574.074 Hz  
FIDRES 0.353213 Hz  
AQ 1.4156276 sec  
RG 64  
DM 43.200 usec  
DE 6.00 usec  
TE 300.0 K  
D1 5.0000000 sec

CHANNEL f1  
NUC1 <sup>1</sup>H  
P1 9.00 usec  
PL1 -6.00 dB  
SFO1 400.1324710 MHz

F2 - Processing parameters  
SI 32768  
SF 400.1300045 MHz  
WDW EM  
SSB 0  
LB 0.30 Hz  
GB 0  
PC 1.00

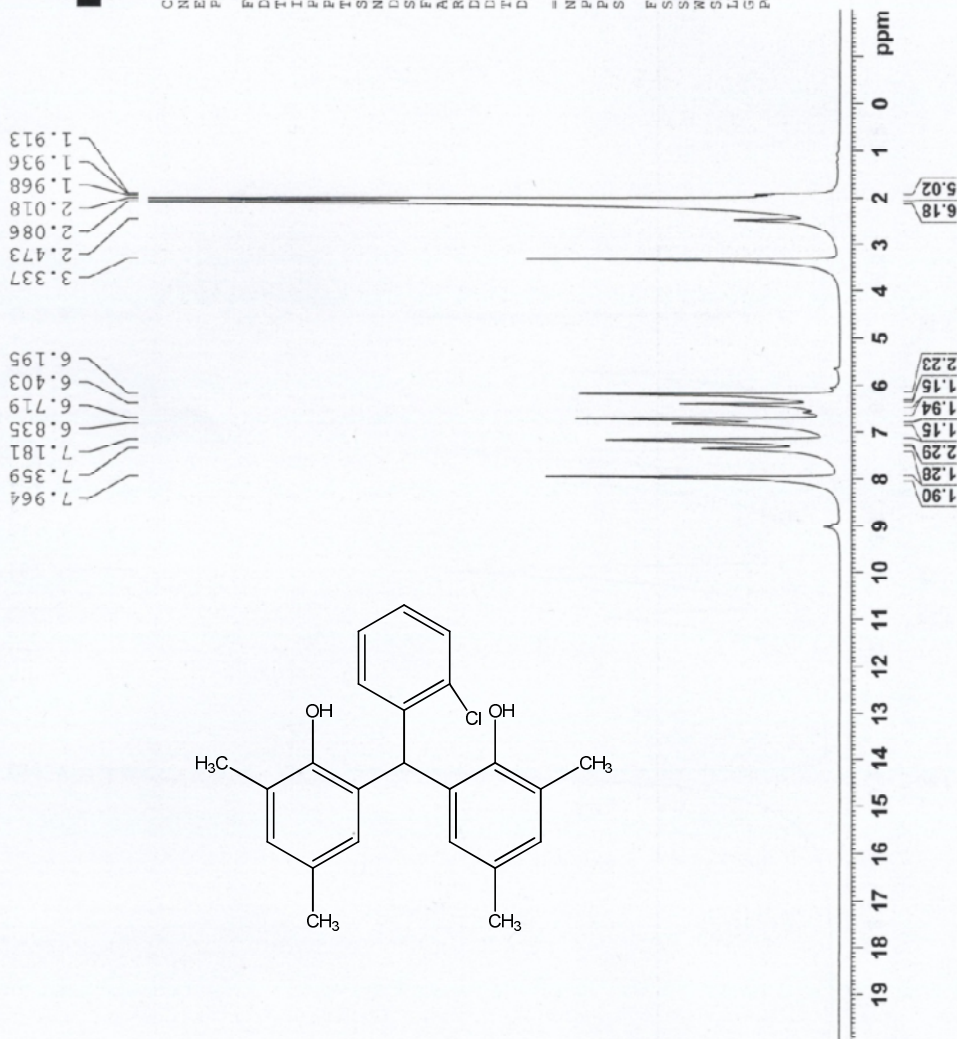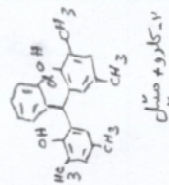

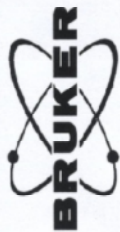

Current Data Parameters  
NAME 3H-5  
EXPNO 241  
PROCNO 1

F2 - Acquisition Parameters

Date\_ 20140315  
Time\_ 8.57  
INSTRUM spect  
PROBHD 5 mm Multinucl  
PULPROG zg  
TD 32768  
SOLVENT DMSO  
NS 32  
DS 0  
SWH 11574.074 Hz  
FIDRES 0.353213 Hz  
AQ 1.4156276 sec  
RG 161.3  
DW 43.200 usec  
DE 6.00 usec  
TE 300.0 K  
D1 5.0000000 sec

===== CHANNEL f1 =====  
NUC1 1H  
P1 9.00 usec  
PL1 -6.00 dB  
SFO1 400.1324710 MHz

F2 - Processing Parameters

SI 32768  
SF 400.1300045 MHz  
WDW EM  
SSB 0  
LB 0.30 Hz  
GB 0  
PC 1.00

8.012  
7.502  
7.299  
6.807  
6.786  
6.736  
6.330  
6.177  
3.334  
3.326  
2.478  
2.082  
2.034  
2.027  
1.926

1.24  
1.07  
1.36  
1.92  
2.01  
1.23  
2.13  
6.34  
6.00

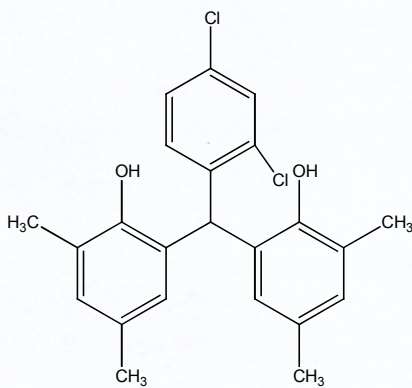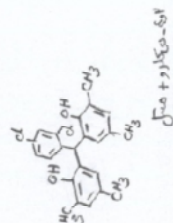

19 18 17 16 15 14 13 12 11 10 9 8 7 6 5 4 3 2 1 0 ppm

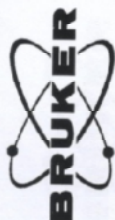

Current Data Parameters  
NAME: 3H-3  
EXPNO: 183  
PROCNO: 1

F2 - Acquisition Parameters  
Date\_ 20140305  
Time\_ 8.09  
INSTRUM spect  
PROBHD 5 mm Multinucl  
PULPROG zg  
TD 32768  
SOLVENT DMSO  
NS 32  
DS 0  
SWH 11574.074 Hz  
FIDRES 0.353213 Hz  
AQ 1.4156276 sec  
RG 71.6  
DW 43.200 usec  
DE 6.00 usec  
TE 300.0 K  
D1 5.00000000 sec

===== CHANNEL f1 =====  
NUC1 1H  
P1 9.00 usec  
PL1 -6.00 dB  
SFO1 400.1324710 MHz

F2 - Processing parameters  
SI 32768  
SF 400.1300645 MHz  
WDW EM  
SSB 0  
LB 0.30 Hz  
GB 0  
PC 1.00

7.984  
7.202  
7.064  
6.779  
6.728  
6.350  
6.263

3.347  
2.477  
2.095  
2.027  
1.951

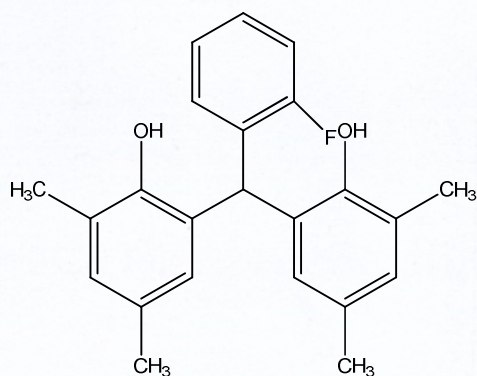

19 18 17 16 15 14 13 12 11 10 9 8 7 6 5 4 3 2 1 0 ppm

2.07  
2.17  
1.30  
2.17  
3.38  
1.39  
2.17  
5.72  
6.00

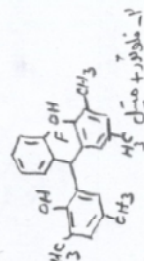





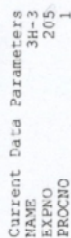

## F2 - Acquisition Parameters

| Rate    | Acquisition Parameters |
|---------|------------------------|
| 14.15   | 12740368               |
| INSTRUM | Spect                  |
| PROBHD  | 5 mm Multinucl         |
| PULPROG | zg                     |
| ID      | 32748                  |
| SOLVENT | DMSO                   |
| NS      | 32                     |
| DS      | 0                      |
| SWH     | 11574.074              |
| FIDRES  | 0.353213               |
| MG      | 1.4156276              |
| W       | 161.3                  |
| W       | 43.200                 |
| W       | 6.00                   |
| TE      | 300.0                  |
| TD      | 5.0000000              |

```

===== CHANNEL f1 =====
NUC1      1H      9.00 usec
Pl        -6.00 dB
Pl1
SF01      400.1324710 MHz

```

| F2 - Processing parameters |                 |
|----------------------------|-----------------|
| SI                         | 32768           |
| SF                         | 400.1300C45 MHz |
| WDW                        | EM              |
| SSE                        | 0               |
| LB                         | 0.30 Hz         |
| GB                         | 0               |
| PC                         | 1.00            |

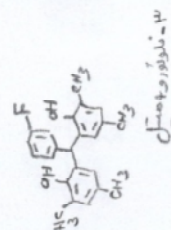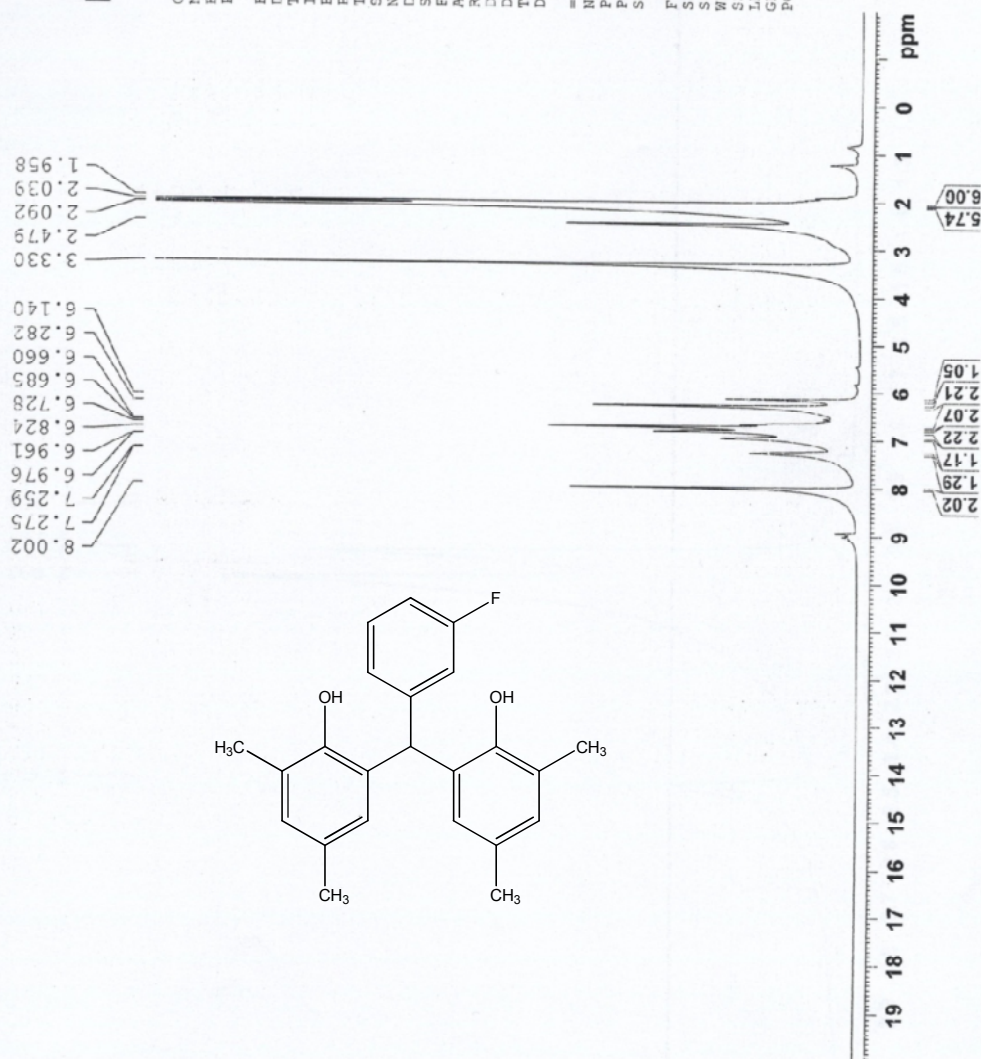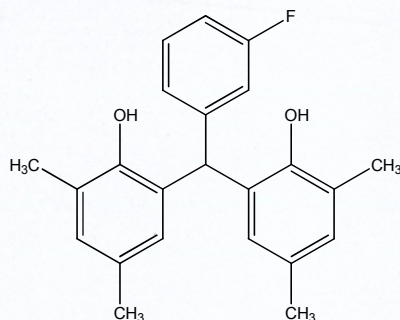

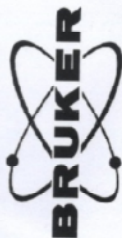

Current Data Parameters  
NAME 3H-3  
EXPNO 186  
PROCNO 1

F2 - Acquisition Parameters  
Date\_ 20140305  
Time\_ 8.18  
INSTRUM spect  
PROBHD 5 mm Multinucl  
PULPROG zg  
TD 32768  
SOLVENT DMSO  
NS 32  
DS 0  
SWH 11574.074 Hz  
FIDRES 0.353213 Hz  
AQ 1.4156276 sec  
RG 114  
DW 43.200 usec  
DE 6.00 usec  
TE 300.0 K  
D1 5.00000000 sec

CHANNEL f1  
NUC1 1H  
P1 9.00 usec  
PL1 -6.00 dB  
SFO1 400.1324710 MHz

F2 - Processing parameters  
SI 32768  
SF 400.1300045 MHz  
WDW EM  
SSB 0  
LB 0.30 Hz  
GB 0  
PC 1.00

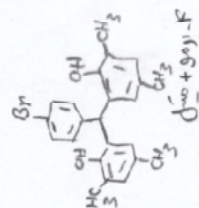

7.965  
7.388  
6.886  
6.704  
6.251  
6.072

3.318  
2.459  
2.069

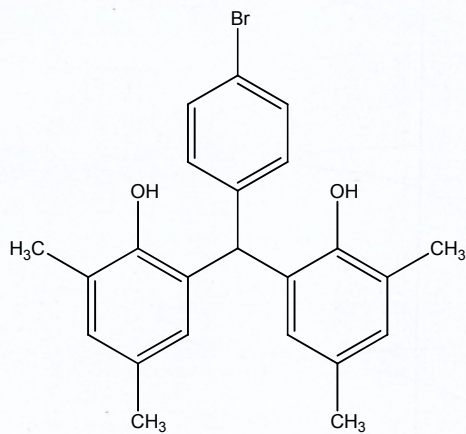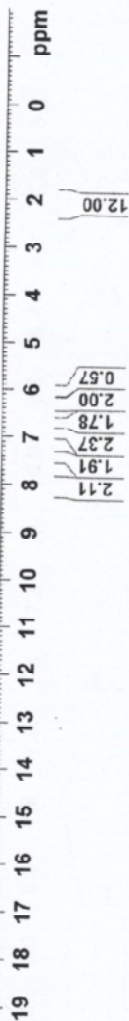

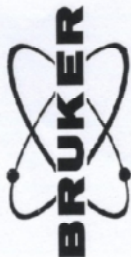

Current Data Parameters  
NAME 3H-3  
EXPNO 215  
PROCNO 1

F2 - Acquisition Parameters  
Date\_ 20140309  
Time 14.00  
INSTRUM spect  
PROBHD 5 mm Multinucl  
PULPROG zg  
TD 32768  
SOLVENT DMSO  
NS 32  
DS 0  
SWH 11574.074 Hz  
FIDRES 0.353213 Hz  
AQ 1.4156276 sec  
RG 143.7  
DW 43.200 usec  
DE 6.00 usec  
TE 300.0 K  
D1 5.00000000 sec

CHANNEL f1 =====  
NUC1 1H  
P1 9.00 usec  
PL1 -6.00 dB  
SFO1 400.1324710 MHz

F2 - Processing parameters  
SI 32768  
SF 400.1300045 MHz  
WDW EM  
SSB 0  
IB 0  
CB 0  
IC 1.00

3.325  
2.472  
2.085  
2.034

8.015  
7.338  
7.213  
7.194  
7.065  
6.967  
6.727  
6.267  
6.108

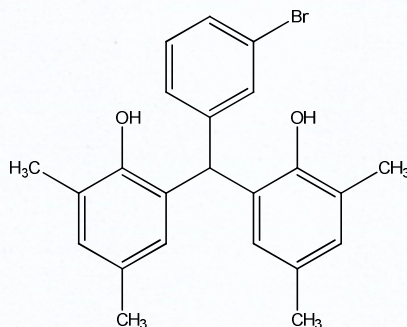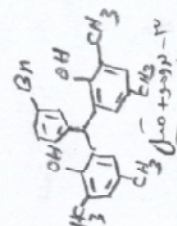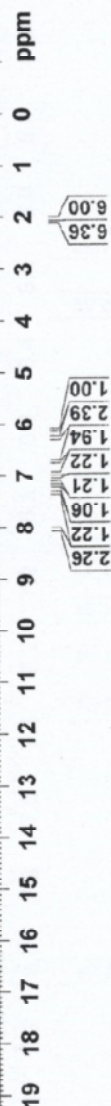



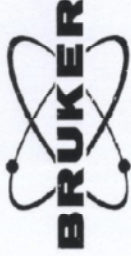

Current Data Parameters  
NAME 5H-3  
EXPNO 170  
PROCNO 1

F2 - Acquisition Parameters

Date\_ 20140304  
Time\_ 8.19  
INSTRUM spect  
PROBHD 5 mm Multinucl  
PULPROG zg  
TD 32768  
SOLVENT DMSO  
NS 32  
DS 0  
SWH 11574.074 Hz  
FIDRES 0.353213 Hz  
AQ 1.4156276 sec  
RG 64  
DM 43.200 usec  
DE 6.00 usec  
TE 300.0 K  
D1 5.0000000 sec

===== CHANNEL f1 =====  
NUC1 <sup>1</sup>H  
P1 9.00 usec  
PL1 -6.00 dB  
SFO1 400.1324710 MHz

F2 - Processing parameters

SI 32768  
SF 400.1300045 MHz  
WDW EM  
SSB 0  
LB 0.30 Hz  
GB 0  
PC 1.00

7.970  
7.538  
7.218  
7.103  
7.087  
6.836  
6.722  
6.356  
6.184

3.349  
2.478  
2.091  
2.020  
1.944

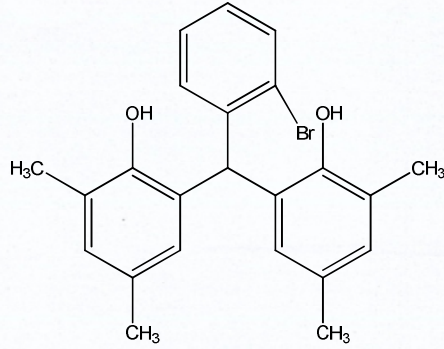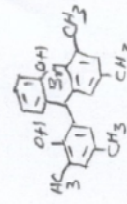

dimethyl-  
hydroxy-  
phenyl-  
ether

19 18 17 16 15 14 13 12 11 10 9 8 7 6 5 4 3 2 1 0 ppm

2.13  
1.02  
1.38  
1.03  
1.92  
1.11  
1.98  
5.90  
5.48



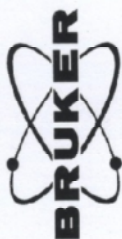

Current Data Parameters  
NAME 3H-3  
EXPNO 169  
PROCNO 1

F2 - Acquisition Parameters

Date\_ 20140303  
Time\_ 15.06  
INSTRUM spect  
PROBHD 5 mm Multinucl  
PULPROG zg  
TD 32768  
SOLVENT DMSO  
NS 32  
DS 0  
SWH 11574.074 Hz  
FIDRES 0.363213 Hz  
AQ 1.4116276 sec  
RG 101.6  
DW 45.200 usec  
DE 6.00 usec  
TE 300.3 K  
D1 5.00000000 sec

===== CHANNEL f1 =====  
NUC1 1H  
P1 9.00 usec  
PL1 -5.00 dB  
SFO1 400.1324710 MHz

F2 - Processing parameters

SI 32768  
SF 400.1300045 MHz  
WDW EM  
SSB 0  
LB 0.30 Hz  
GB 0  
PC 1.00

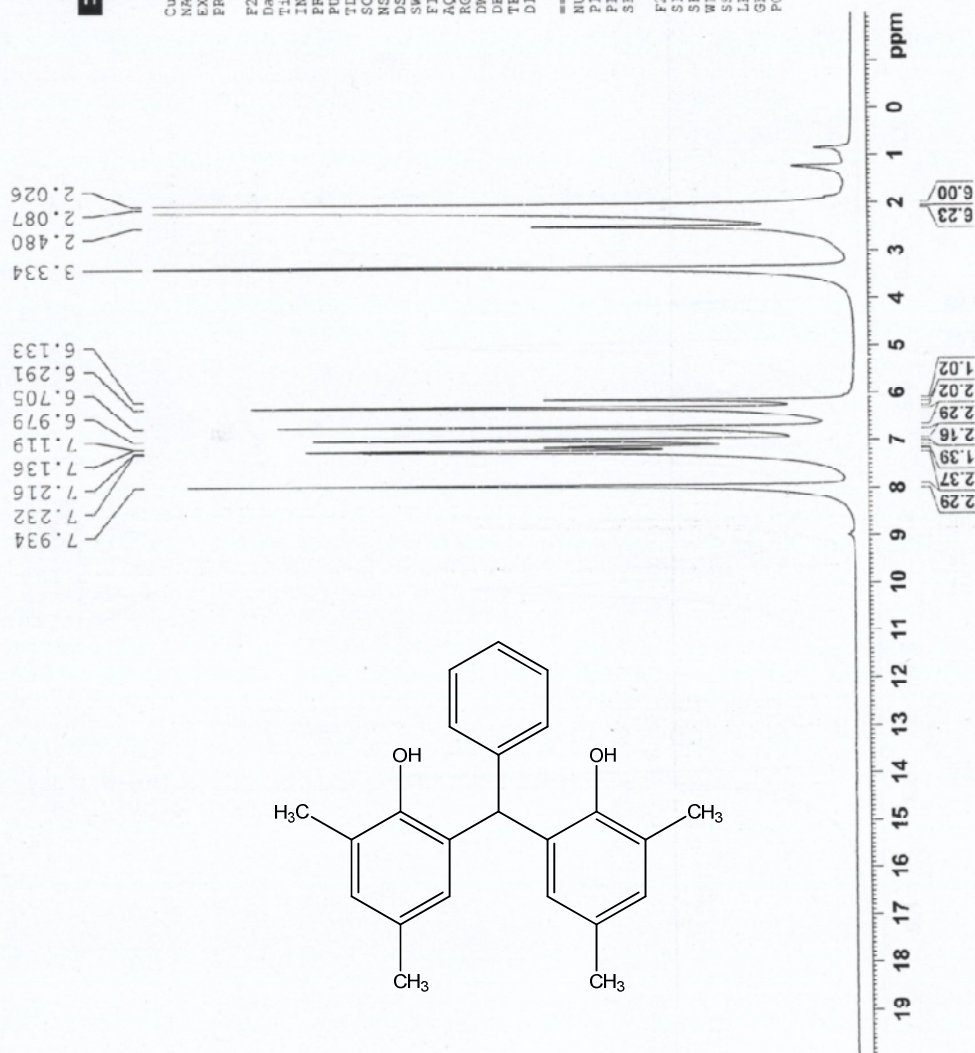

بنیادی

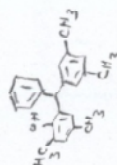

بنیادی و متیل

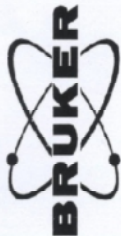

Current Data Parameters  
NAME 3H-3  
EXPNO 207  
PROCNO 1

F2 - Acquisition Parameters

Date 20140308  
Time 14.33  
INSTRUM spect  
PROBHD 5 mm Multiruc1  
PULPROG zg  
TD 32768  
SOLVENT DMSO  
NS 32  
DS 0  
SWH 11574.074 Hz  
FIDRES 0.352213 Hz  
AQ 1.415276 sec  
RG 613  
DE 43.200 usec  
TE 300.0 K  
D1 5.0000000 sec

===== CHANNEL f1 =====  
NUC1 1H  
P1 9.00 usec  
PL1 -6.00 dB  
SFO1 400.1324710 MHz

F2 - Processing Parameters

SI 32768  
SF 400.1300045 MHz  
WDW EM  
SSB 0  
LB 0.30 Hz  
GB 0  
PC 1.00

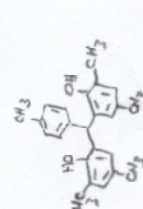

2,6-DM-4-M-3,5-DH

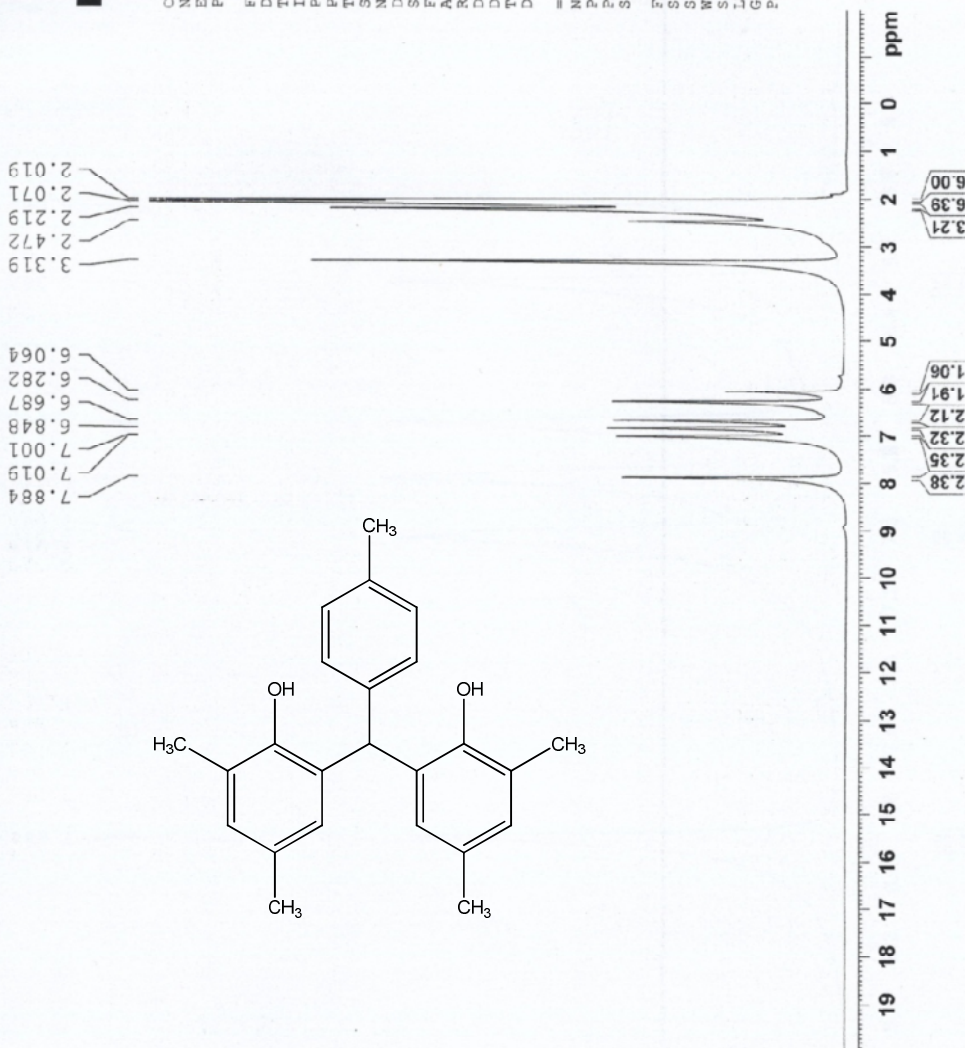

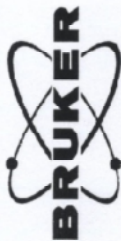

Current Data Parameters  
NAME 3H-3  
EXPNO 238  
PROCNO 1

F2 - Acquisition Parameters

Date\_ 20140312  
Time\_ 13.40  
INSTRUM spect  
PROBHD 5 mm Multinucl  
PULPROG zg  
TD 32768  
SOLVENT DMSO  
NS 32  
DS 0  
SWH 11574.074 Hz  
FIDRES 0.353213 Hz  
AQ 1.4156276 sec  
RG 71.8  
DW 43.200 usec  
DE 6.00 usec  
TE 300.0 K  
D1 5.0000000 sec

===== CHANNEL f1 =====  
NUC1 1H  
P1 9.00 usec  
PL1 -6.00 dB  
SFO1 400.1324710 MHz

F2 - Processing parameters

SI 32768  
SF 400.1300045 MHz  
WDW EM  
SSB 0  
LB 0.30 Hz  
GB 0  
PC 1.00

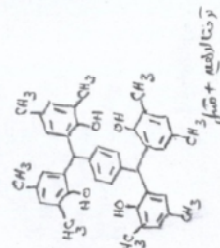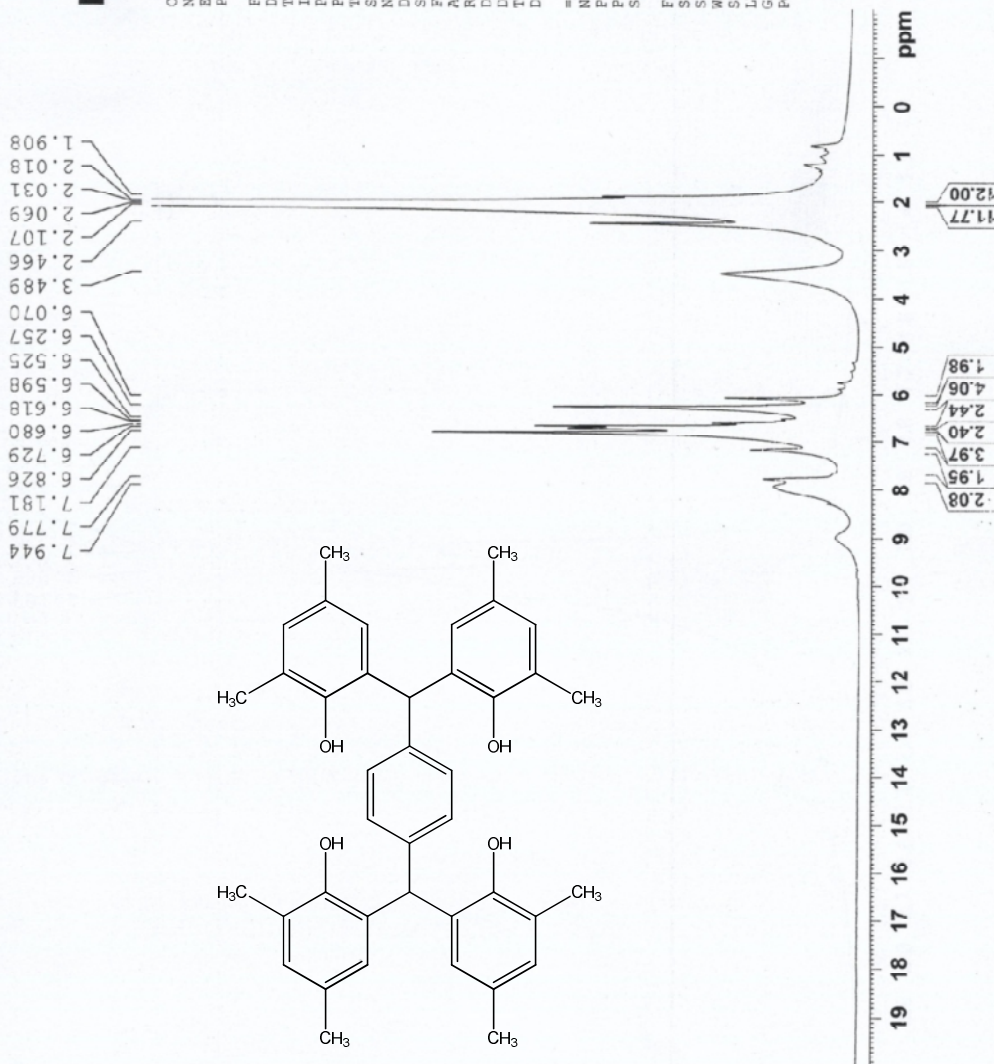

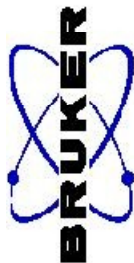

Current Data Parameters  
NAME 3H  
EXPNO 1904  
PROCNO 1

F2 - Acquisition Parameters  
Date\_ 20131222  
Time\_ 10.12  
INSTRUM spect  
PROBHD 5 mm Multinucl  
PULPROG zg  
TD 32768  
SOLVENT DMSO  
NS 16  
DS 0  
SWH 11574.074 Hz  
FIDRES 0.355213 Hz  
AQ 1.4156276 sec  
RG 256  
DW 43.200 usec  
DE 6.00 usec  
TE 300.0 K  
D1 5.00000000 sec

===== CHANNEL f1 =====  
NUC1 1H  
P1 5.00 usec  
PL1 -6.00 dB  
SF01 400.1324710 MHz

F2 - Processing parameters  
SI 32768  
SF 400.1300045 MHz  
WDW EM  
SSB 0  
LB 0  
GB 0  
PC 1.00

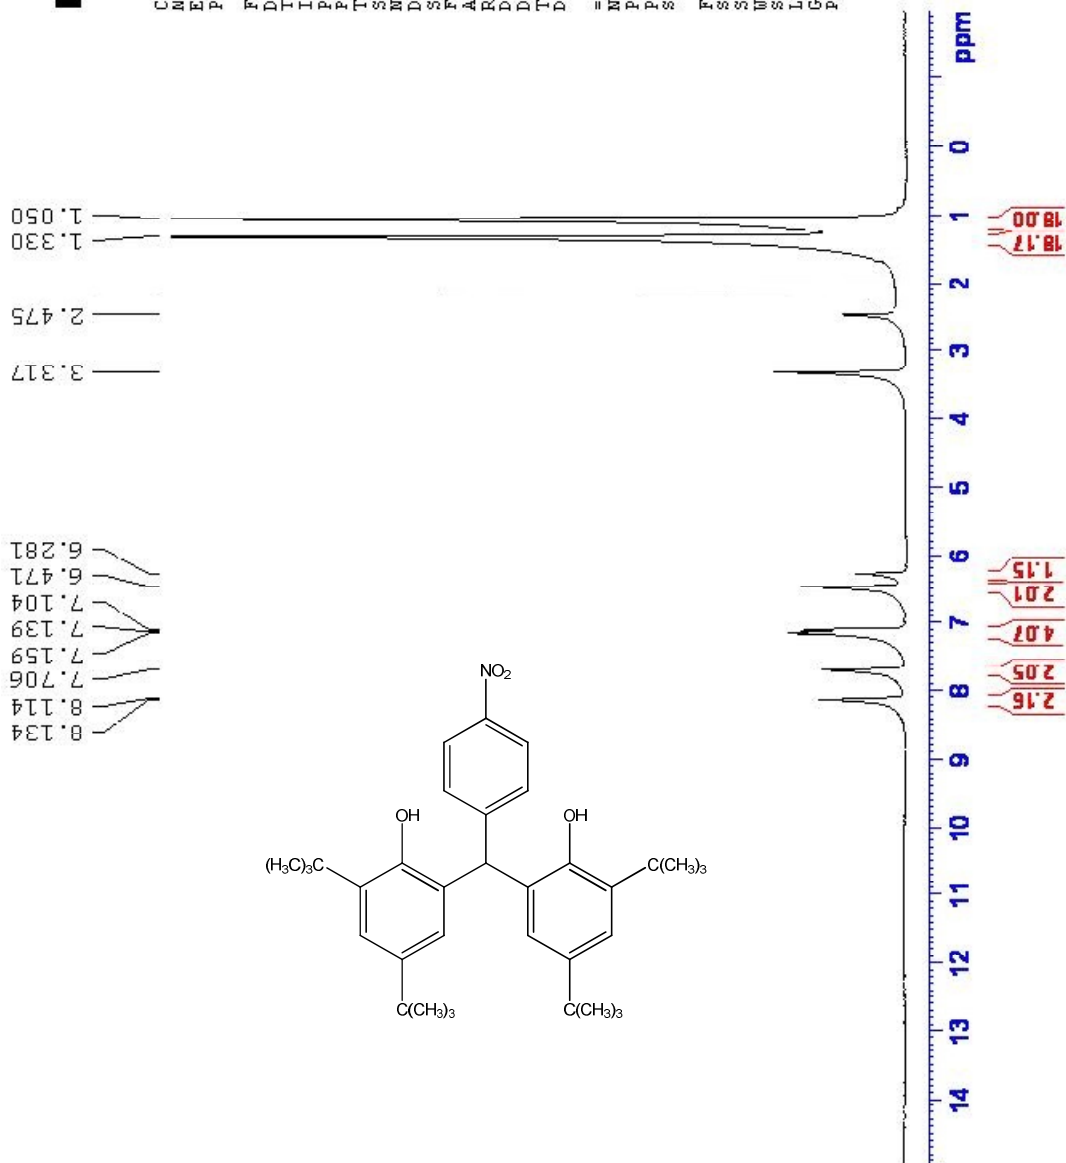



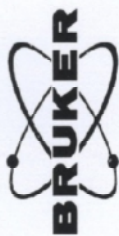

Current Data Parameters  
NAME: 3H-2  
EXPNO: 21  
PROCNO: 1

F2 - Acquisition Parameters

Date\_: 20100909  
Time: 13.31  
INSTRUM: spect  
PROBHD: 5 mm Multinuc1  
PULPROG: zg  
TD: 32768  
SOLVENT: DMSO  
NS: 32  
DS: 0  
SWH: 11574.074 Hz  
FIDRES: 0.353213 Hz  
AQ: 1.4156216 sec  
RG: 40.3  
DW: 43.200 usec  
DE: 6.00 usec  
TE: 300.0 K  
D1: 5.0000000 sec

===== CHANNEL f1 =====

NUC1: 1H  
P1: 9.00 usec  
PL1: -6.00 dB  
SFO1: 400.1324710 MHz

F2 - Processing parameters

SI: 32768  
SF: 400.1300045 MHz  
WDW: EM  
SSB: 0  
LB: 0.30 Hz  
GB: 0  
EC: 1.00

8.254  
6.681  
6.628  
3.077  
3.742  
3.387  
2.465  
2.102  
2.066  
2.000

2.04  
1.95  
2.04  
2.32  
6.23  
6.67

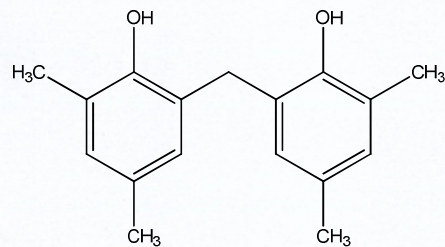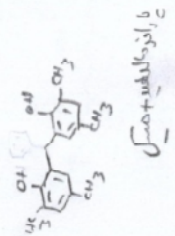

ppm

<sup>13</sup>C NMR Spectra of selected compounds.

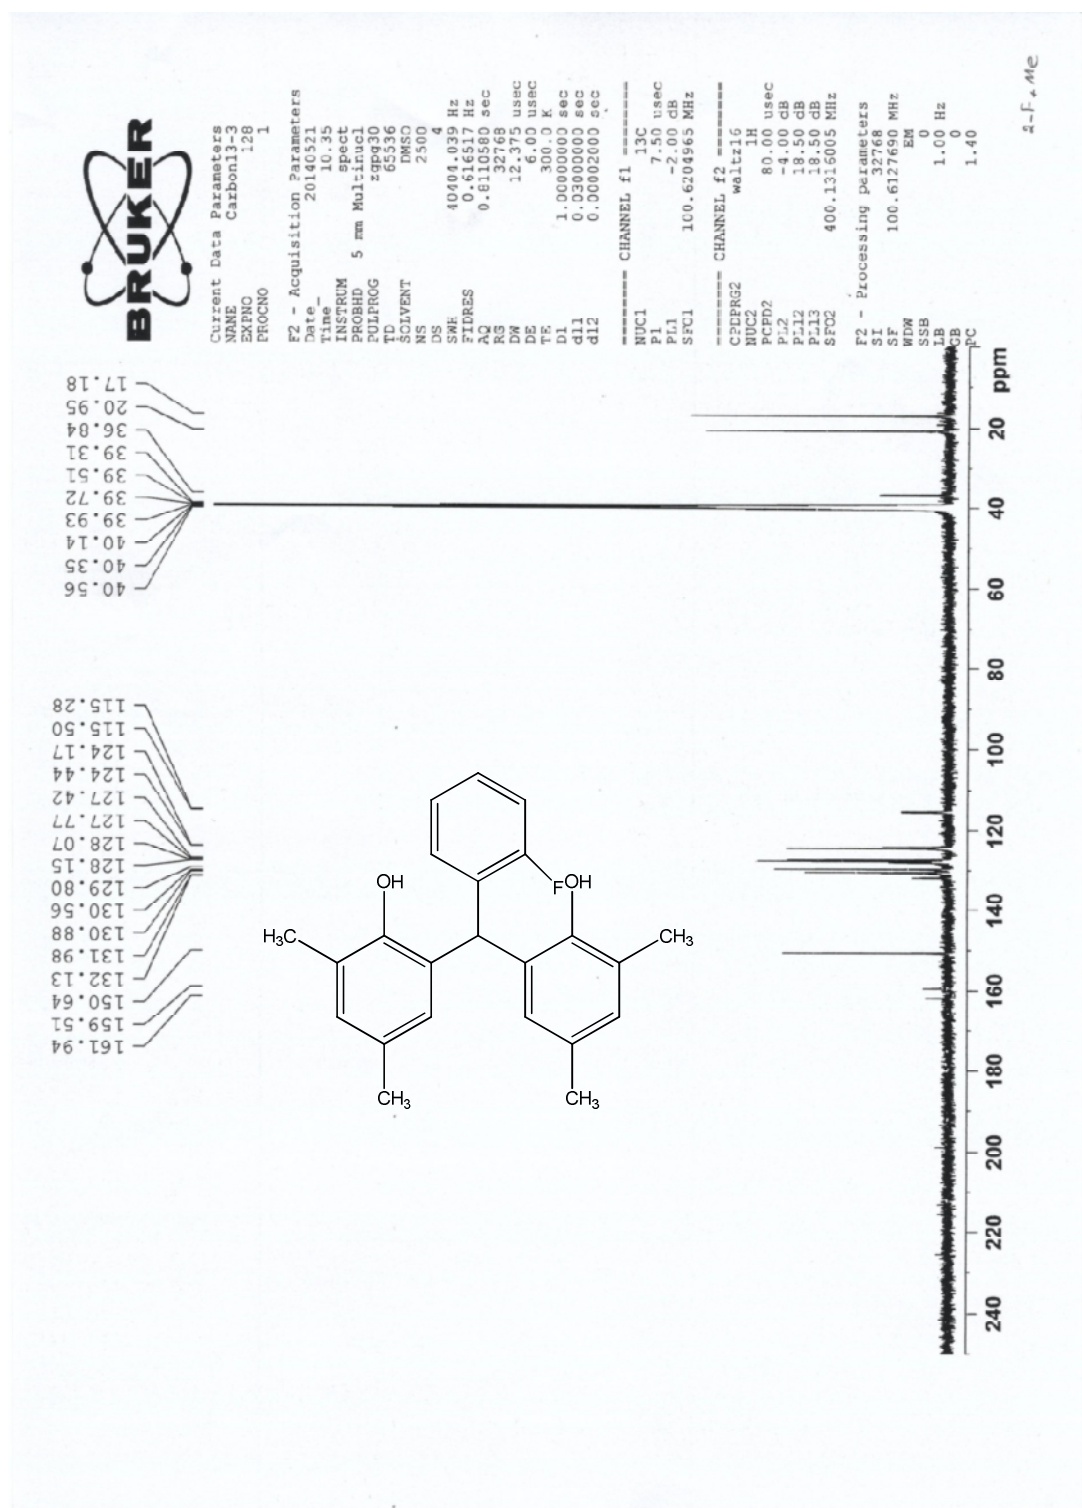

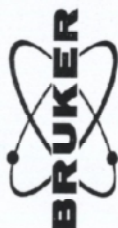

Current Data Parameters  
NAME Carbon13-3  
EXPNO 133  
PROCNO 1

F2 - Acquisition Parameters  
Date\_ 20140525  
Time 13.47

INSTRUM spect  
PROBHD 5 mm Multinucl  
PULPROG zgpg30  
TD 65536  
SOLVENT DMSO  
NS 2500  
DS 4

SWH 40404.039 Hz  
FIDRES 0.616517 Hz  
AQ 0.610580 sec  
RG 32768  
DM 12.375 usec  
DE 6.00 usec  
TE 300.0 K  
D1 1.0000000 sec  
d11 0.0300000 sec  
d12 0.0000200 sec

===== CHANNEL f1 =====  
NUC1 <sup>13</sup>C  
P1 7.30 usec  
PL1 -2.00 dB  
SFO1 100.6204965 MHz

===== CHANNEL f2 =====  
CPOBPG2 waltz16  
NUC2 <sup>1</sup>H  
PCPD2 80.00 usec  
PL2 4.00 dB  
PL12 18.00 dB  
PL13 18.00 dB  
SFO2 400.1316015 MHz

F2 - Processing parameters  
SI 32768  
SF 100.6127650 MHz  
WDW EM  
SSB 0  
GB 1.00 Hz  
PC 1.40

304 Me

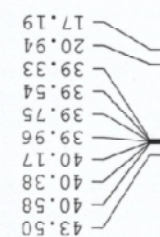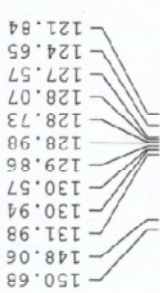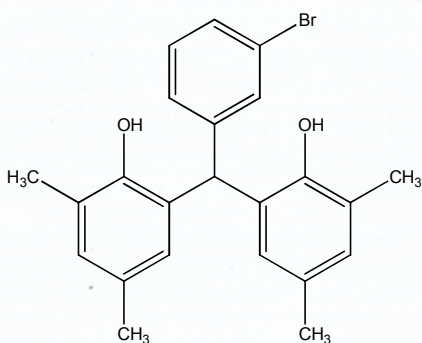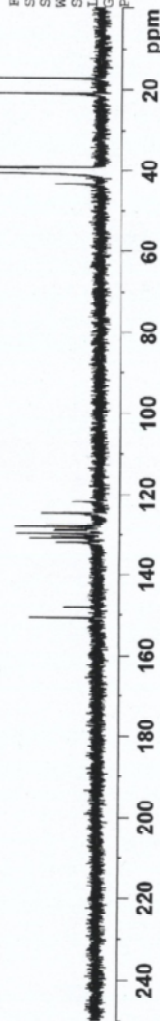

240 220 200 180 160 140 120 100 80 60 40 20 ppm

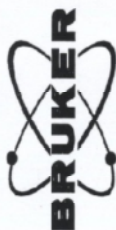

Current Data Parameters  
NAME Carbon13  
EXPNO 129  
PROCNO 1

F2 - Acquisition Parameters  
Date\_ 20140524  
Time\_ 11.03  
INSTRUM spect  
PROBHD 5 mm Multinuc  
PULPROG zgpg30  
TD 65536  
SOLVENT DMSO  
NS 2500  
DS 4  
SWH 40404.039 Hz  
FIDRES 0.616517 Hz  
AQ 0.8110580 sec  
RG 32768  
DK 12.375 usec  
DE 6.00 usec  
TE 300.0 K  
D1 1.00000000 sec  
d11 0.03000000 sec  
d12 0.00002000 sec

CHANNEL f1 13C  
NUC1 13C  
P1 7.50 usec  
PL1 -2.00 dB  
SFO1 100.6204965 MHz

CHANNEL f2 waltz16  
NUC2 1H  
PCPD2 80.00 usec  
PL2 -4.00 dB  
PL12 18.50 dB  
PL13 18.50 dB  
SFO2 400.1316005 MHz

F2 - Processing parameters  
SI 32768  
SF 100.6127690 MHz  
WDW EM  
SSB 0  
LB 1.00 Hz  
GB 0  
PC 1.40

4-MC + Me

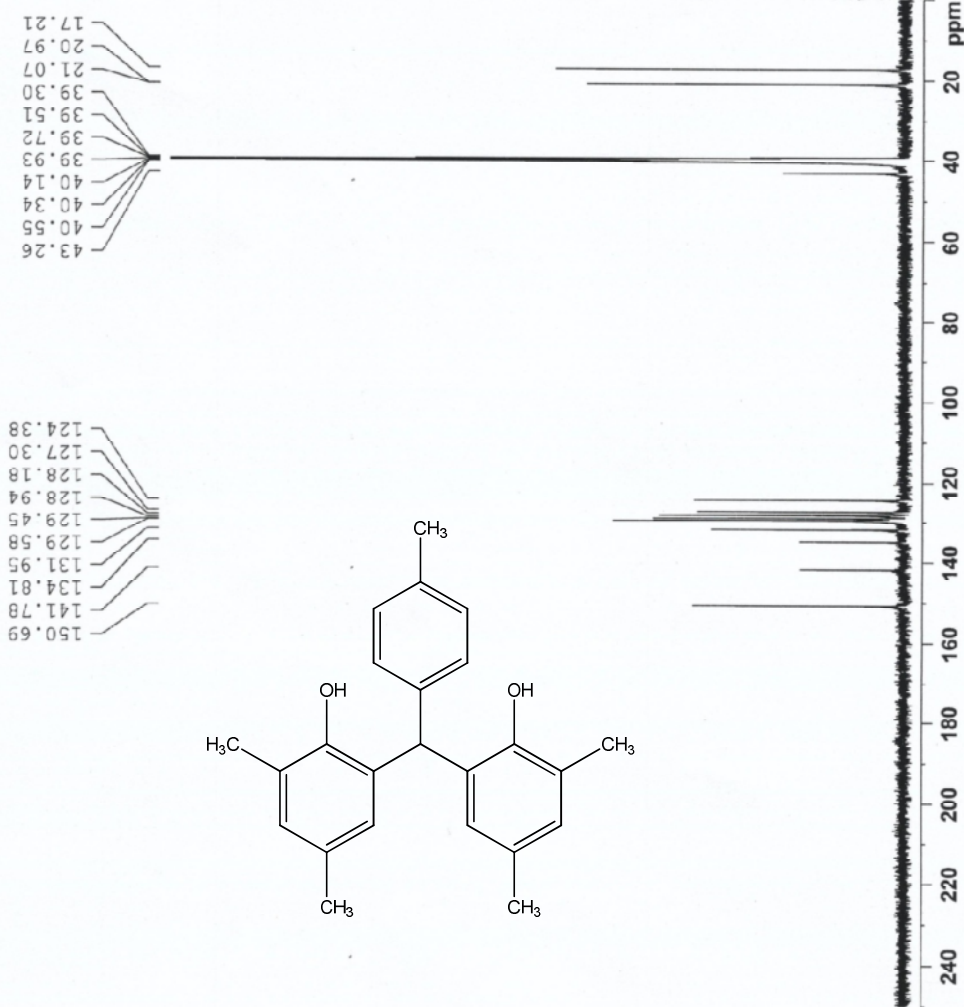



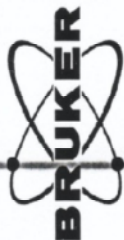

Current Data Parameters  
NAME Carbon13-3  
EXPNO 144  
PROCNO 1

F2 - Acquisition Parameters

Date\_ 20140531  
Time\_ 13.46  
INSTRUM spect  
PROBHD 5 mm Multispec1  
PULPROG zgpg30  
TD 65536  
SOLVENT DMSO  
NS 2500  
DS 4  
SWH 40404.039 Hz  
FIDRES 0.516517 Hz  
AQ 0.8110560 sec  
RG 32768  
DM 12.375 usec  
DE 6.00 usec  
TE 300.0 K  
D1 1.00000000 sec  
d11 0.03000000 sec  
d12 0.00002000 sec

===== CHANNEL F1 =====  
NUC1 13C  
P1 7.50 usec  
PL1 -2.00 dB  
SFO1 100.6204965 MHz

===== CHANNEL F2 =====  
CPDPRG2 waitz16  
NUC2 1H  
PCPD2 80.00 usec  
PL2 -4.00 dB  
PL12 18.50 dB  
PL13 18.50 dB  
SFO2 400.1316005 MHz

F2 - Processing parameters  
SI 32768  
SF 100.6127590 MHz  
WDW EM  
SSB 0  
LB 0  
GB 0  
PC 1.40

44.12  
40.54  
40.33  
40.12  
39.91  
39.70  
39.50  
39.29  
35.16  
34.27  
31.70  
30.35

153.25  
151.02  
146.18  
141.46  
137.52  
130.87  
130.64  
130.50  
125.08  
123.47  
121.76

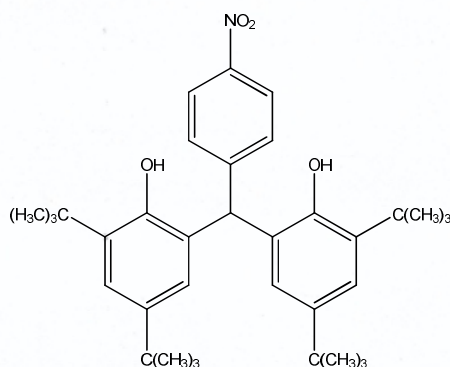

ppm

20

40

60

80

100

120

140

160

180

200

220

240

260

280

300

320

340

360

380

400

420

440

460

480

500

520

540

560

580

600

620

640

660

680

700

720

740

760

780

800

820

840

860

880

900

920

940

960

980

1000

1020

1040

1060

1080

1100

1120

1140

1160

1180

1200

1220

1240

1260

1280

1300

1320

1340

1360

1380

1400

1420

1440

1460

1480

1500

1520

1540

1560

1580

1600

1620

1640

1660

1680

1700

1720

1740

1760

1780

1800

1820

1840

1860

1880

1900

1920

1940

1960

1980

2000

2020

2040

2060

2080

2100

2120

2140

2160

2180

2200

2220

2240

2260

2280

2300

2320

2340

2360

2380

2400

2420

2440

2460

2480

2500

2520

2540

2560

2580

2600

2620

2640

2660

2680

2700

2720

2740

2760

2780

2800

2820

2840

2860

2880

2900

2920

2940

2960

2980

3000

3020

3040

3060

3080

3100

3120

3140

3160

3180

3200

3220

3240

3260

3280

3300

3320

3340

3360

3380

3400

3420

3440

3460

3480

3500

3520

3540

3560

3580

3600

3620

3640

3660

3680

3700

3720

3740

3760

3780

3800

3820

3840

3860

3880

3900

3920

3940

3960

3980

4000

4020

4040

4060

4080

4100

4120

4140

4160

4180

4200

4220

4240

4260

4280

4300

4320

4340

4360

4380

4400

4420

4440

4460

4480

4500

4520

4540

4560

4580

4600

4620

4640

4660

4680

4700

4720

4740

4760

4780

4800

4820

4840

4860

4880

4900

4920

4940

4960

4980

5000

5020

5040

5060

5080

5100

5120

5140

5160

5180

5200

5220

5240

5260

5280

5300

5320

5340

5360

5380

5400

5420

5440

5460

5480

5500

5520

5540

5560

5580

5600

5620

5640

5660

5680

5700

5720

5740

5760

5780

5800

5820

5840

5860

5880

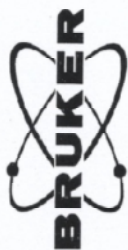

Current Data Parameters  
NAME Carbon13-3  
EXPNO 122  
PROCNO 1

F2 - Acquisition Parameters  
Date\_ 20140518  
Time 13.53  
INSTRUM spect  
PROBHD 5 mm Multinuc1  
PULPROG zgpg30  
TD 65536  
SOLVENT DMSO  
NS 2500  
DS 4  
SWH 40404.039 Hz  
FIDRES 0.616517 Hz  
AQ 0.8110580 sec  
RG 32769  
DE 12.375 usec  
TE 300.0 K  
D1 1.00000000 sec  
d11 0.03000000 sec  
d12 0.00002000 sec

CHANNEL f1  
NUC1 13C  
P1 7.50 usec  
PL1 -2.00 dB  
SFO1 100.6204965 MHz

CHANNEL f2  
CPDPRG2 waltz16  
NUC2 1H  
PCPD2 80.00 usec  
PL2 -4.00 dB  
PL12 18.50 dB  
PL13 18.50 dB  
SFO2 400.1318005 MHz

F2 - Processing parameters  
SI 32768  
SF 100.6127690 MHz  
WDW EM  
SSB 0  
LB 1.00 Hz  
GB 0  
PC 1.40

Ther + Me

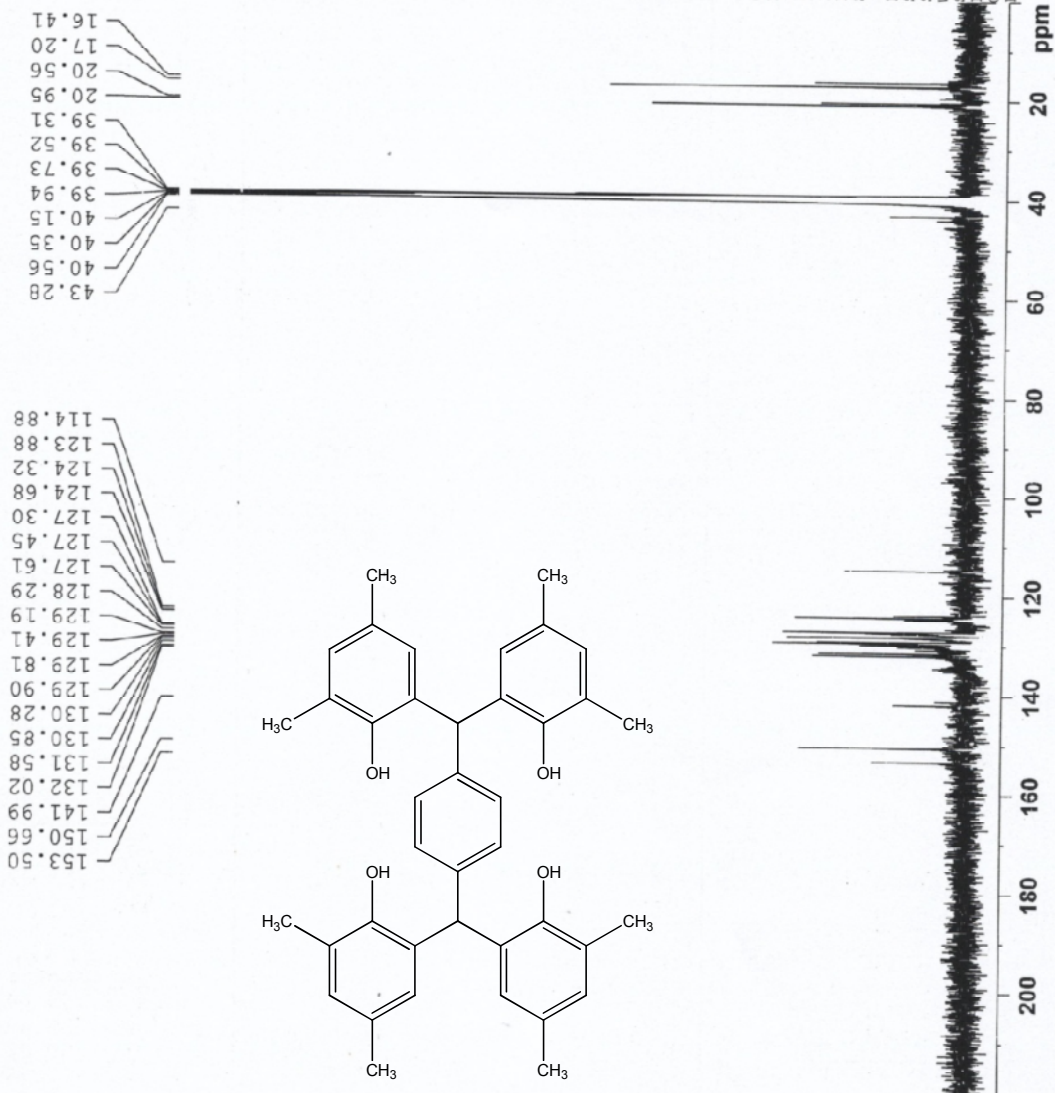

Supplement: c4ra10177d1.pdf [file c4ra10177d1.pdf]
